# Supplementary material for: Estimation of Pedestrian Origin-Destination Demand in Train Stations
Source: Atypon-hosted journal article supplement (doi:10.1287/trsc.2016.0723), 2017-05-04
Supplement: trsc.2016.0723-sm.pdf [file trsc.2016.0723-sm.pdf]

## Appendix A: Notation

**Table 1** List of recurrent variables.

|                                                                                                        |                                   |
|--------------------------------------------------------------------------------------------------------|-----------------------------------|
| $\tau \in \mathcal{T}, \Delta t$                                                                       | time                              |
| $\mathcal{G} = (\mathcal{N}, \mathcal{L}), \mathcal{C} \subset \mathcal{N}$                            | graph, centroids                  |
| $\nu \in \mathcal{N}, \lambda \in \mathcal{L}, \alpha \in \mathcal{A}$                                 | node, link, area                  |
| $\rho = (\lambda_1, \lambda_2, \dots), \rho \in \mathcal{R}$                                           | route                             |
| $\kappa \in \mathcal{K}$                                                                               | OD pair                           |
| $\zeta \in \mathcal{Z}, t_{\zeta}^{\text{arr}}, t_{\zeta}^{\text{dep}}$                                | train, arrival and departure time |
| $\pi \in \mathcal{P}$                                                                                  | platform                          |
| $\mathbf{d} = [d_{\kappa, \tau}]$                                                                      | demand                            |
| $\mathbf{f} = [f_{\lambda, \tau}]$                                                                     | flow                              |
| $\mathbf{a} = [a_{\alpha, \tau}]$                                                                      | accumulation                      |
| $\mathbf{e}_{\text{on}} = [e_{\zeta}^{\text{on}}], \mathbf{e}_{\text{off}} = [e_{\zeta}^{\text{off}}]$ | exchange volumes                  |
| $\Delta$                                                                                               | reduction matrix                  |
| $\Sigma(\mathbf{d}; \mathbf{y})$                                                                       | assignment model                  |
| $\mathbf{y}$                                                                                           | parameter vector                  |
| $\chi = [\chi_p], \phi = [\phi_{\lambda, \tau}]$                                                       | schedule-based estimates          |
| $\eta, \varepsilon, \omega$                                                                            | errors                            |
| $r_{\zeta, \lambda}^{\text{sec}}$                                                                      | platform sector split ratio       |
| $w$                                                                                                    | estimation weight                 |

## Appendix B: Assignment model for walking facilities

This section outlines an assignment model for walking facilities in an uncongested train station. In accordance with Assumptions 2 and 3 in Section 3.3.1 of the main article, the prevailing traffic conditions are demand-independent.

*Route choice:* The outcome of the route choice model is represented by a route choice matrix  $\mathbf{R}(\mathbf{y}) = [r_{(\rho, \tau'), (\kappa, \tau)}]$  of size  $|\mathcal{R}||\mathcal{T}| \times |\mathcal{K}||\mathcal{T}|$ . An element  $r_{(\rho, \tau'), (\kappa, \tau)}(\mathbf{y})$  denotes the probability that a pedestrian associated with OD pair  $\kappa$  and departure time interval  $\tau$  chooses route  $\rho$  during time interval  $\tau'$ . Route choice is instantaneous such that  $r_{(\rho, \tau'), (\kappa, \tau)} = 0$  if  $\tau \neq \tau'$ .

The time to traverse link  $\lambda$  during time interval  $\tau$  is denoted by  $\Delta t_{\lambda, \tau}^{\text{trav}}(\mathbf{y})$ . The travel time on route  $\rho$  during time interval  $\tau$  is given by

$$U_{\rho, \tau}(\mathbf{y}) = V_{\rho, \tau} + \psi, \quad (1)$$

where  $\psi \sim \text{EV}(0, \vartheta)$  with  $\vartheta$  a calibration parameter contained in  $\mathbf{y}$ , and where the sum of link travel times is given by

$$V_{\rho, \tau}(\mathbf{y}) = \sum_{\lambda \in \rho} \Delta t_{\lambda, \tau}^{\text{trav}}. \quad (2)$$

For OD pair  $\kappa$ , the likelihood that a user chooses route  $\rho \in \mathcal{R}_{\kappa}$  is given by

$$r_{(\rho, \tau), (\kappa, \tau)}(\mathbf{y}) = \frac{\exp(-\vartheta V_{\rho, \tau})}{\sum_{\rho' \in \mathcal{R}_{\kappa}} \exp(-\vartheta V_{\rho', \tau})}. \quad (3)$$

**Table 2** List of considered network loading maps.

|                                                     |                                                                                                                                                                                                                                                                                                                                                                                              |
|-----------------------------------------------------|----------------------------------------------------------------------------------------------------------------------------------------------------------------------------------------------------------------------------------------------------------------------------------------------------------------------------------------------------------------------------------------------|
| $\mathbf{B} = [b_{(\lambda, \tau'), (\rho, \tau)}]$ | The link flow assignment matrix $\mathbf{B}(\mathbf{y})$ is of size $ \Lambda  \mathcal{T}  \times  \mathcal{R}  \mathcal{T} $ . The entry $b_{(\lambda, \tau'), (\rho, \tau)}(\mathbf{y})$ represents the probability that a pedestrian associated with route $\rho$ and departure time interval $\tau$ reaches link $\lambda$ during time interval $\tau'$ .                               |
| $\mathbf{C} = [c_{(\alpha, \tau'), (\rho, \tau)}]$  | The area accumulation assignment matrix $\mathbf{C}(\mathbf{y})$ is of size $ \mathcal{A}  \mathcal{T}  \times  \mathcal{R}  \mathcal{T} $ . The entry $c_{(\alpha, \tau'), (\rho, \tau)}(\mathbf{y})$ denotes the expected contribution of a pedestrian associated with route $\rho$ and departure time interval $\tau$ to the accumulation of area $\alpha$ during time interval $\tau'$ . |

*Network loading:* The network loading model defines mappings from route flows to link flows and area accumulations. Table 2 defines the corresponding assignment matrices.

Based on these definitions, we may write

$$\Sigma_f(\mathbf{d}; \mathbf{y}) = \mathbf{B}(\mathbf{y})\mathbf{R}(\mathbf{y})\mathbf{d}, \quad (4)$$

and

$$\Sigma_a(\mathbf{d}; \mathbf{y}) = \mathbf{C}(\mathbf{y})\mathbf{R}(\mathbf{y})\mathbf{d}, \quad (5)$$

respectively.

Let the distance along a route  $\rho$  up to the beginning of link  $\lambda$  be denoted by  $\ell_\rho^\lambda$ . Furthermore, let the departure times of pedestrians within a time interval be distributed uniformly, i.e., the distribution of continuous departure time  $t$  for any route during a time interval  $\tau$  is given by

$$h_\tau(t) = \begin{cases} \frac{1}{\Delta t} & \text{if } t \in \tau, \\ 0 & \text{otherwise.} \end{cases} \quad (6)$$

Assuming that each pedestrian is walking at a constant speed, the probability for a person on route  $\rho$  that departs during time interval  $\tau$  to arrive on link  $\lambda$  during time interval  $\tau'$  is given by

$$\begin{aligned} b_{(\lambda, \tau'), (\rho, \tau)} &= \Pr(t \in \tau, t' \in \tau' | \rho, \lambda) \\ &= \Pr\left(t \in \tau, v \in \left[\frac{\ell_\rho^\lambda}{t_{\tau'}^+ - t}, \frac{\ell_\rho^\lambda}{t_{\tau'}^- - t}\right]\right), \end{aligned} \quad (7)$$

where  $t_{\tau'}^-$  and  $t_{\tau'}^+$  represent the bounds of time interval  $\tau'$ , and where  $t$  and  $t'$  represent the continuous departure and arrival time, respectively. For the most common case that  $\ell_\rho^\lambda > 0$  and  $\tau' > \tau$ , we obtain

$$\begin{aligned} b_{(\lambda, \tau'), (\rho, \tau)} &= \int_{t=t_{\tau'}^-}^{t_{\tau'}^+} \int_{v=\ell_\rho^\lambda/(t_{\tau'}^+ - t)}^{\ell_\rho^\lambda/(t_{\tau'}^- - t)} f_v(v) g_\tau(t) \, dv \, dt \\ &= \frac{1}{\Delta t} \int_{t=t_{\tau'}^-}^{t_{\tau'}^+} F_v\left(\frac{\ell_\rho^\lambda}{t_{\tau'}^- - t}\right) - F_v\left(\frac{\ell_\rho^\lambda}{t_{\tau'}^+ - t}\right) \, dt, \end{aligned} \quad (8)$$

where  $F_v(v)$  denotes the cumulative distribution function corresponding to  $f_v(v)$ . Similarly, if  $\ell_\rho^\lambda > 0$  and  $\tau = \tau'$ , we obtain

$$\begin{aligned} b_{(\lambda, \tau), (\rho, \tau)} &= 1 - \Pr(t \in \tau, t' \notin \tau | \rho, \lambda) \\ &= 1 - \Pr\left(t \in \tau, v \in \left[0, \frac{\ell_\rho^\lambda}{t_{\tau}^+ - t}\right]\right) \\ &= 1 - \frac{1}{\Delta t} \int_{t=t_{\tau}^-}^{t_{\tau}^+} F_v\left(\frac{\ell_\rho^\lambda}{t_{\tau}^+ - t}\right) - F_v(0) \, dt. \end{aligned} \quad (9)$$

Thus, the probability that a user associated with route  $\rho$  and departure time interval  $\tau$  reaches link  $\lambda$  during time interval  $\tau'$  is given by

$$b_{(\lambda,\tau'),(\rho,\tau)} = \begin{cases} 0 & \text{if } \ell_\rho^\lambda = 0, \tau < \tau', \\ 1 & \text{if } \ell_\rho^\lambda = 0, \tau = \tau', \\ \text{Eq. (8)} & \text{if } \ell_\rho^\lambda > 0, \tau < \tau', \\ \text{Eq. (9)} & \text{if } \ell_\rho^\lambda > 0, \tau = \tau'. \end{cases} \quad (10)$$

The assignment fraction for area accumulations can be derived accordingly. Let us consider an area  $\alpha$ , and let us assume that each route enters and leaves area  $\alpha$  at most once. Let  $v$  be the constant, individual speed of a person traveling along route  $\rho$ ,  $\ell_{\text{in}}^{\rho,\alpha}$  the distance along the route  $\rho$  to the entrance of area  $\alpha$  and  $\ell_{\text{out}}^{\rho,\alpha}$  the corresponding distance to its exit. Consequently,  $t_{\text{in}} = \ell_{\text{in}}^{\rho,\alpha}/v$  is the time after departure at which a person with speed  $v$  enters area  $\alpha$  and  $t_{\text{out}} = \ell_{\text{out}}^{\rho,\alpha}/v$  the corresponding time at which it is exited. If a route  $\rho$  does not cross area  $\alpha$ , then  $\ell_{\text{in}}^{\rho,\alpha} = \infty$ . If we consider a time interval  $[t^-, t^+]$  after departure, the expected sojourn time for this person with constant speed  $v$  inside the area  $\alpha$  within the interval is given by

$$\varsigma(v, \ell_{\text{in}}^{\rho,\alpha}, \ell_{\text{out}}^{\rho,\alpha}, t^-, t^+) = \begin{cases} t^+ - \ell_{\text{in}}^{\rho,\alpha}/v & \text{if } t^- \leq \ell_{\text{in}}^{\rho,\alpha}/v \leq t^+ \leq \ell_{\text{out}}^{\rho,\alpha}/v, \\ \ell_{\text{out}}^{\rho,\alpha}/v - t^- & \text{if } \ell_{\text{in}}^{\rho,\alpha}/v \leq t^- \leq \ell_{\text{out}}^{\rho,\alpha}/v \leq t^+, \\ t^+ - t^- & \text{if } \ell_{\text{in}}^{\rho,\alpha}/v \leq t^- \leq t^+ \leq \ell_{\text{out}}^{\rho,\alpha}/v, \\ (\ell_{\text{out}}^{\rho,\alpha} - \ell_{\text{in}}^{\rho,\alpha})/v & \text{if } t^- \leq \ell_{\text{in}}^{\rho,\alpha}/v \leq \ell_{\text{out}}^{\rho,\alpha}/v \leq t^+, \\ 0 & \text{otherwise.} \end{cases} \quad (11)$$

In Eq. (11), the first line corresponds to the case where a person reaches the area within the time interval, but does not exit it. The second line is the inverse case. The third line represents the case where a person stays within the area during the full time period. Finally, the fourth line represents the case where a pedestrian enters and leaves the area during the period of interest, and the fifth case the situation where a pedestrian is not present in area  $\alpha$  during the time interval at all.

Using Eq. (11), the expected contribution of a pedestrian traveling along route  $\rho$  with departure time interval  $\tau$  to the accumulation of area  $\alpha$  during time interval  $\tau'$  is given by

$$\begin{aligned} c_{(\alpha,\tau'),(\rho,\tau)} &= \int_{t=t_\tau^-}^{t_\tau^+} \int_{v=0}^{\infty} \frac{\varsigma(v, \ell_{\text{in}}^{\rho,\alpha}, \ell_{\text{out}}^{\rho,\alpha}, t_\tau^- - t, t_\tau^+ - t)}{\Delta t} f_v(v) h_\tau(t) \, dv \, dt \\ &= \frac{1}{\Delta t^2} \int_{v=0}^{\infty} f_v(v) \int_{t=t_\tau^-}^{t_\tau^+} \varsigma(v, \ell_{\text{in}}^{\rho,\alpha}, \ell_{\text{out}}^{\rho,\alpha}, t_\tau^- - t, t_\tau^+ - t) \, dt \, dv. \end{aligned} \quad (12)$$

For an efficient implementation, we note that the assignment fractions (10) and (12) are time-invariant, i.e., for  $\Delta\tau = \tau' - \tau$  it holds that

$$b_{(\lambda,\tau'),(\rho,\tau)} = b_{(\lambda,\Delta\tau),(\rho,0)} \quad \text{and} \quad c_{(\alpha,\tau'),(\rho,\tau)} = c_{(\alpha,\Delta\tau),(\rho,0)}. \quad (13)$$

To further reduce the cost involved in computing Eq. (10) and Eq. (12), a maximum travel time  $TT_{\text{max}}$  is defined. If  $\Delta\tau \geq TT_{\text{max}}$ , it is assumed that  $b_{(\lambda,\Delta\tau),(\rho,0)} = 0 \, \forall \lambda, \rho$  and  $c_{(\alpha,\Delta\tau),(\rho,0)} = 0 \, \forall \alpha, \rho$ . The threshold  $TT_{\text{max}}$  is chosen such that the error incurred by this numerical approximation is negligible.
